# Supplementary material for: Tailoring Chlorthalidone Aqueous Solubility by Cocrystallization: Stability and Dissolution Behavior of a Novel Chlorthalidone-Caffeine Cocrystal
Source: MDPI journal article supplement (doi:10.3390/pharmaceutics14020334), 2022-01-30
Supplement: s1 [file s1]

# Supplementary Materials: Tailoring Chlorthalidone Aqueous Solubility by Cocrystallization: Stability and Dissolution Behavior of a Novel Chlorthalidone-Caffeine Cocrystal

Christian Rodríguez-Ruiz, Pedro Montes-Tolentino, Jorge Guillermo Domínguez-Chávez, Hugo Morales-Rojas, Herbert Höpfl and Dea Herrera-Ruiz

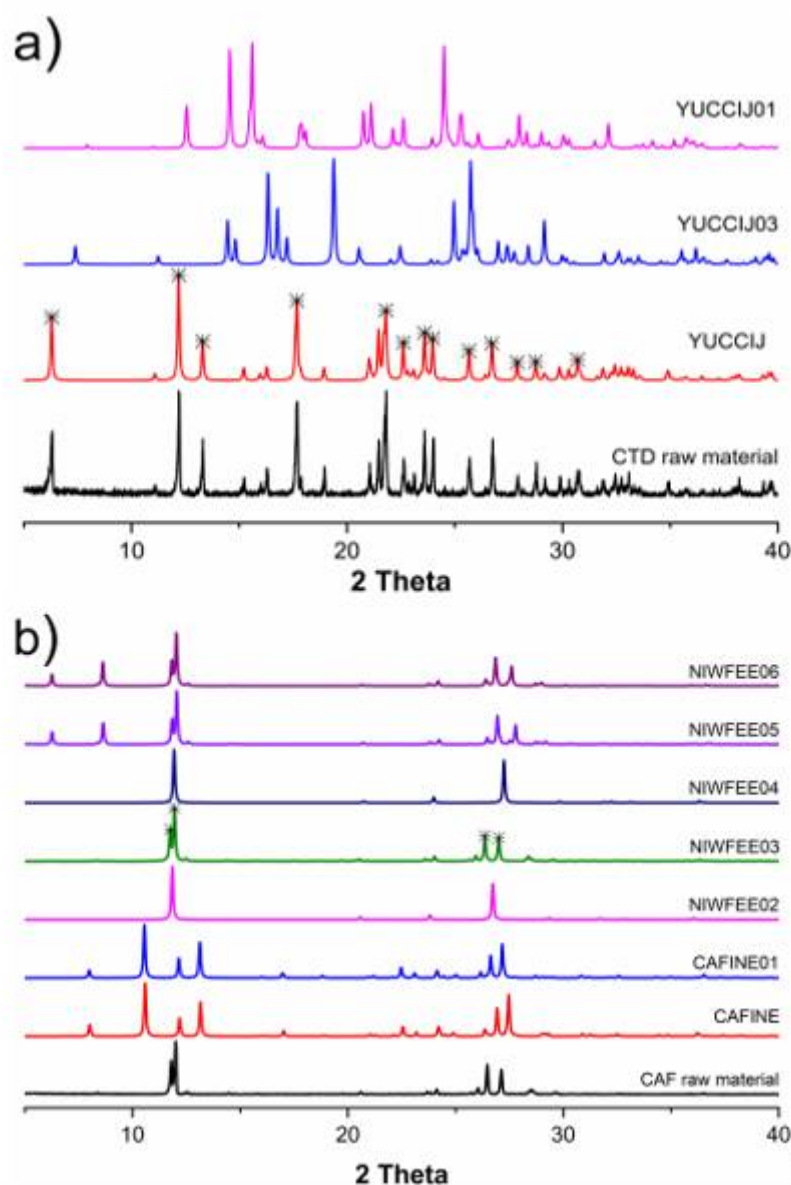

**Figure S1.** PXRD patterns for the respective polymorphs reported in the CSD (Version 2020.3.0) of (a) CTD and (b) CAF. Note: Asterisks indicate peaks identical to the corresponding raw material.

**Table S1.** Intermolecular hydrogen bonding interactions for cocrystal CTD-CAF.

| Motif      | H-Bond         | D–H<br>(Å) | H···A<br>(Å) | D···A (Å) | ∠DHA<br>(deg) | Symmetr<br>Operator |
|------------|----------------|------------|--------------|-----------|---------------|---------------------|
| <b>I</b>   | N1A-H1AA...O2B | 0.91       | 2.30         | 3.188(4)  | 166           | 1+x, -1+y, z        |
|            | N1B-H1BB...O2A | 0.91       | 2.43         | 3.313(4)  | 163           | -1+x, 1+y, z        |
| <b>II</b>  | N2A-H2A...O4B  | 0.86       | 2.12         | 2.959(4)  | 165           | x, y, z             |
|            | N2B-H2B...O4A  | 0.86       | 1.97         | 2.819(4)  | 171           | x, y, z             |
| <b>III</b> | O3B-H3B...O4B  | 0.82       | 1.96         | 2.778(3)  | 174           | 1-x, 1-y, 2-z       |
| <b>IV</b>  | N2A-H2A...O4B  | 0.86       | 2.12         | 2.959(4)  | 165           | x, y, z             |
|            | O3B-H3B...O4B  | 0.82       | 1.96         | 2.778(3)  | 174           | 1-x, 1-y, 2-z       |
|            | N1A-H1AB...O3B | 0.91       | 2.05         | 2.948(4)  | 168           | 1-x, 1-y, 2-z       |
| <b>V</b>   | O3A-H3A...O6   | 0.82       | 1.90         | 2.715(3)  | 172           | x, y, z             |
| <b>VI</b>  | N1B-H1BA...N5  | 0.91       | 2.32         | 3.068(4)  | 139           | 1-x, 2-y, 1-z       |

Table S2. Polymers used in this study and some relevant properties.

| Polymer                                           | Molecular Structure                                                                 | Average Molecular Weight                                             | Viscosity                                                                        | Hydrogen Bond (Donor-Acceptor) |
|---------------------------------------------------|-------------------------------------------------------------------------------------|----------------------------------------------------------------------|----------------------------------------------------------------------------------|--------------------------------|
| Copovidone (Kollidon VA® 64 Fine)                 | 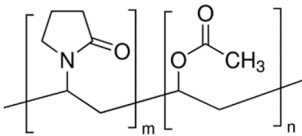   | 45,000–70,000                                                        | At concentrations less than 10% w/v, the viscosity is less than 10 mPas at 25 °C | D = 0<br>A = 2                 |
| Polyvinylpyrrolidone (Kollidon® 25)               |    | ~34,000                                                              | 3.5–5.5 mPas 10% w/v in H <sub>2</sub> O at 20 °C                                | D = 0<br>A = 1                 |
| Polyvinylpyrrolidone (Kollidon® 90)               |    | ~1,300,000                                                           | 300–700 mPas, 10% w/v in H <sub>2</sub> O at 20 °C                               |                                |
| Poloxamer (Kolliphor® P 188)                      |    | 7,680–9,510                                                          | Not available                                                                    | D = 1<br>A = 3                 |
| Poloxamer (Kolliphor® P 407)                      |    | 9,840–14,600                                                         | Not available                                                                    |                                |
| Hydroxypropyl cellulose (HPC 80,000)              |   | ~80,000                                                              | 250–800 cPs, 10 % (w/v) in H <sub>2</sub> O at 25 °C                             | D = 3<br>A = 6                 |
| Hydroxypropyl cellulose (HPC 370,000)             |  | ~370,000                                                             | 150–400 cPs, 2 % (w/v) in H <sub>2</sub> O at 25 °C                              |                                |
| Methylcellulose (Methocel® A15)                   |  | 27.5–31.5% methoxy basis                                             | 12–18 mPa.s, 2% (w/v) in H <sub>2</sub> O at 20 °C                               | D = 0<br>A = 5                 |
| Methylcellulose (Methocel® 60 H.G.)               |  | 28–30% methoxy basis                                                 | 35–55 mPas, 2% (w/v) in H <sub>2</sub> O at 20 °C                                |                                |
| Hydroxypropyl methylcellulose (Methocel® E5 LV)   |  | ~10,000<br>Methoxy content 28 – 30 %<br>hydroxypropoxy content 7–12% | 4–6 mPas, 2% (w/v) in H <sub>2</sub> O at 20 °C                                  |                                |
| Hydroxypropyl methylcellulose (Methocel® E15 LV)  |  | ~13,000<br>Methoxy content 28 – 30 %<br>hydroxypropoxy content 7–12% | 12–18 mPas, 2% (w/v) in H <sub>2</sub> O at 20 °C                                | D = 2<br>A = 6                 |
| Hydroxypropyl methylcellulose (Methocel® E50LV)   |  | ~20,000<br>Methoxy content 28 – 30 %<br>hydroxypropoxy content 7–12% | 40–60 mPas, 2% (w/v) in H <sub>2</sub> O at 20 °C                                |                                |
| Hydroxypropyl methylcellulose (HPMC 80 – 120 cPs) |  | ~26,000<br>Methoxy content 19 – 24 %<br>hydroxypropoxy content 7–12% | 80–120 cP, 2% (w/v) in H <sub>2</sub> O at 20 °C                                 |                                |

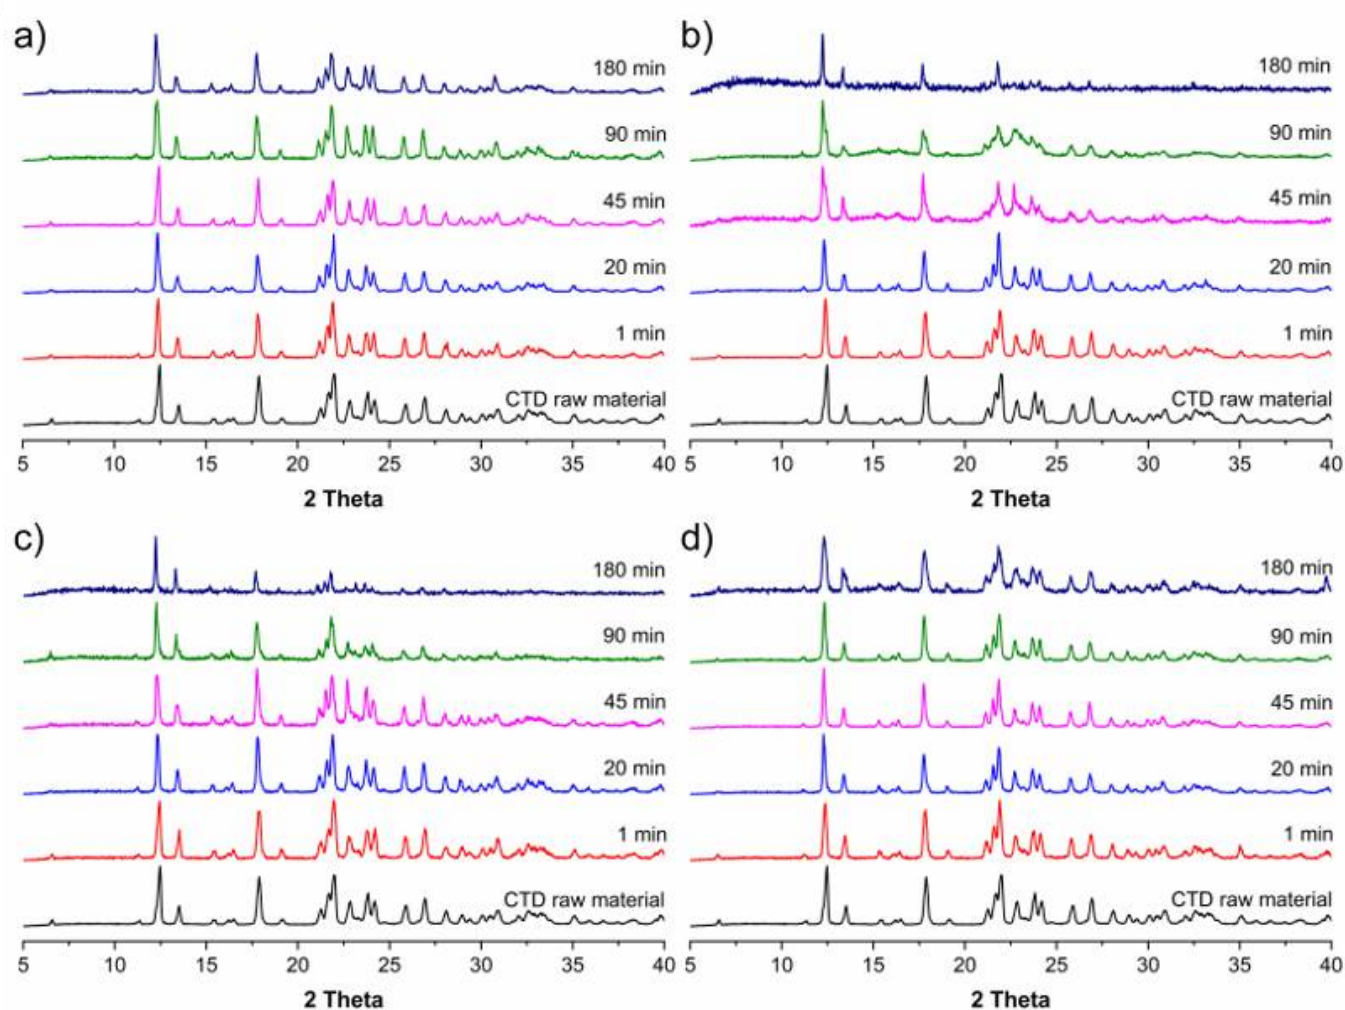

**Figure S2.** PXRD patterns of solids recovered from powder dissolution experiments under **non-sink** conditions of CTD in (a) HCl pH 1.2, (b) PBS pH 6.8, (c) HCl pH 1.2 with HPMC 80–120 cPs pre-dissolved at 0.5 % (w/v), and (d) PBS pH 6.8 with HPMC 80–120 cPs pre-dissolved at 0.5 % (w/v).

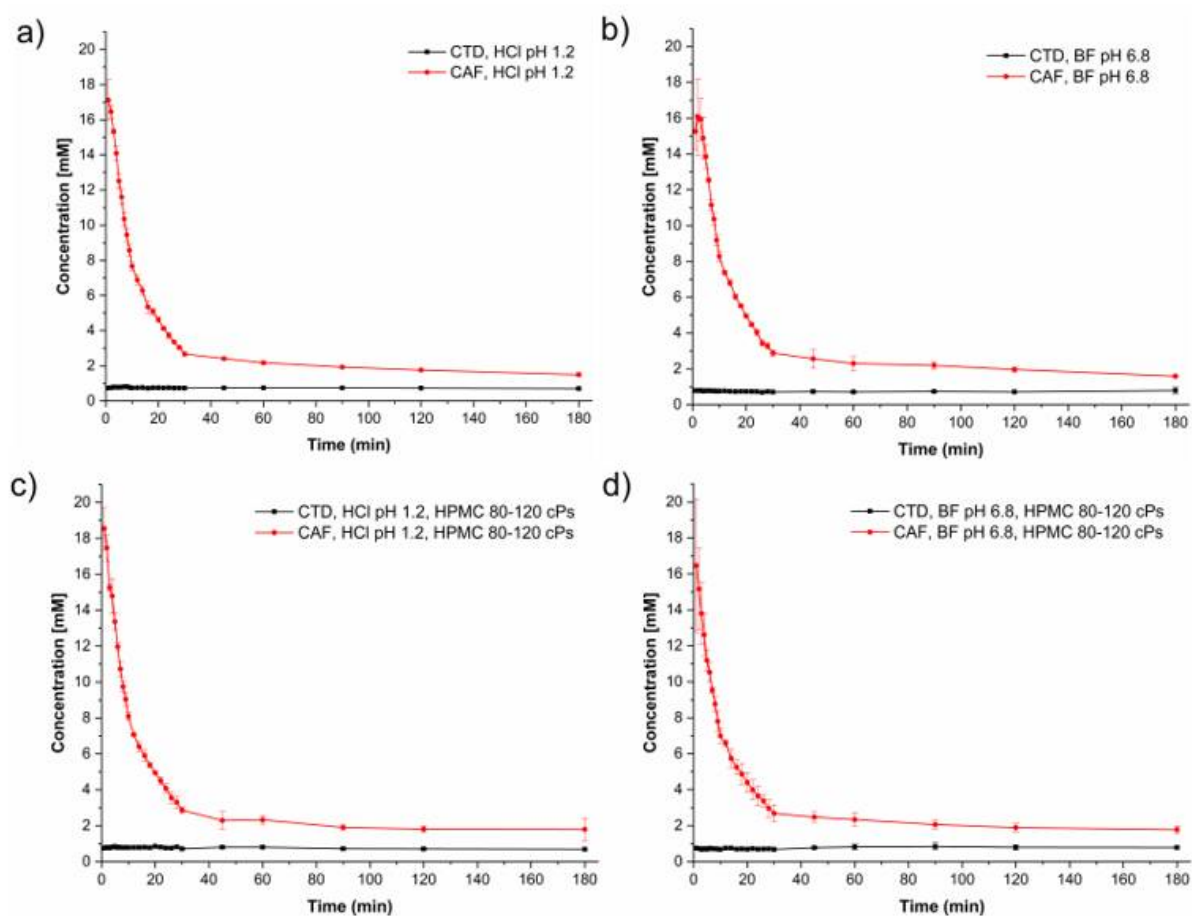

**Figure S3.** Dissolution profiles under **non-sink** conditions of physical mixtures containing CTD and CAF in 2:1 molar ratio in (a) HCl pH 1.2, (b) PBS pH 6.8, (c) HCl pH 1.2 with HPMC 80-120 cPs pre-dissolved at 0.5 % (w/v), and (d) PBS pH 6.8 with HPMC 80-120 cPs pre-dissolved at 0.5 % (w/v). Mean  $\pm$  S.D.,  $n = 3$ . Note: CAF profiles did not supersaturate. The amount of caffeine in 200 mg of physical mixture was 45 mg. Because of the high solubility of CAF, the coformer dissolved completely within the first minute of the experiments; therefore, the amount of CAF found in the medium decreased according to the dilution effect introduced by medium replacement. Hence, CAF concentrations decreased as observed in the dissolution profiles.



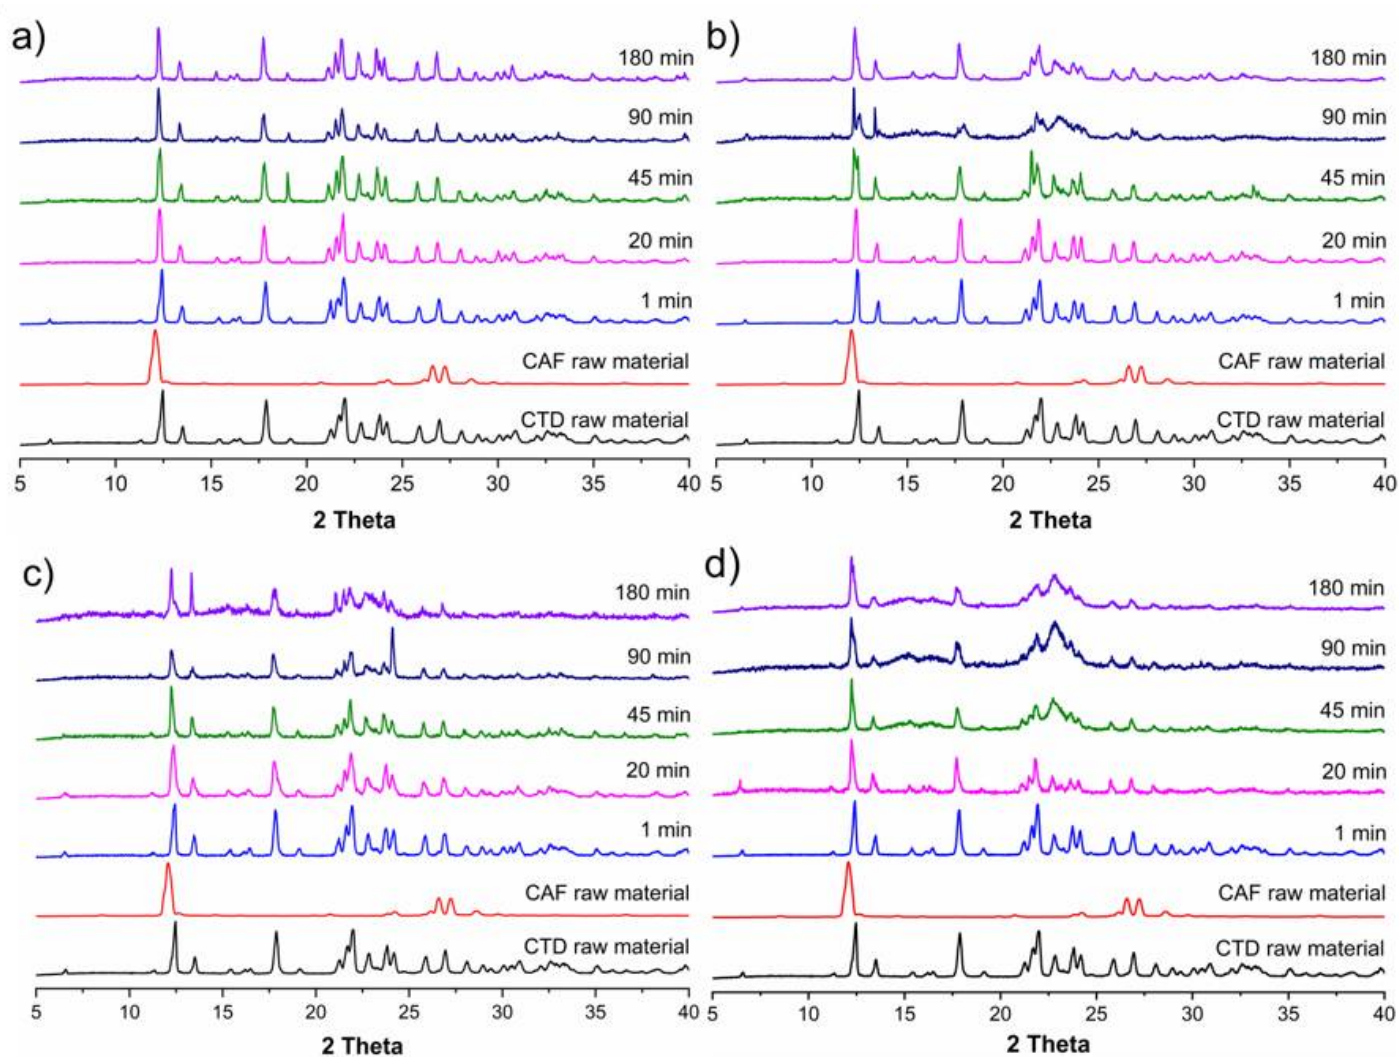

**Figure S4.** PXRD patterns from solids recovered from powder dissolution experiments under **non-sink** conditions of physical mixtures of CTD and CAF in 2:1 molar ratio in (a) HCl pH 1.2, (b) PBS pH 6.8, (c) HCl pH 1.2 with HPMC 80-120 cPs pre-dissolved at 0.5 % (w/v), and (d) PBS pH 6.8 with HPMC 80-120 cPs pre-dissolved at 0.5 % (w/v).

**Table S3.** Induction time ( $t_{ind}$ ), supersaturation ratio ( $S_{ratio}$ ), and data required to determine  $t_{ind}$  and  $S_{ratio}$  correlation for induced precipitation experiments in PBS pH 6.8.

| $C_{CTD, t=0}$<br>(mM) | $t_{ind}$<br>(min) | $\log t_{ind}$ (min) | $S_{ratio}$<br>( $C_{CTD, t=0}/S_{drug}$ ) | $\log S_{ratio}$ | $(\log S_{ratio})^{-2}$ |
|------------------------|--------------------|----------------------|--------------------------------------------|------------------|-------------------------|
| 3.8                    | 77                 | 1.90                 | 5.9                                        | 0.77             | 1.68                    |
| 4.1                    | 63                 | 1.80                 | 6.4                                        | 0.80             | 1.55                    |
| 4.4                    | 50                 | 1.70                 | 6.9                                        | 0.83             | 1.44                    |

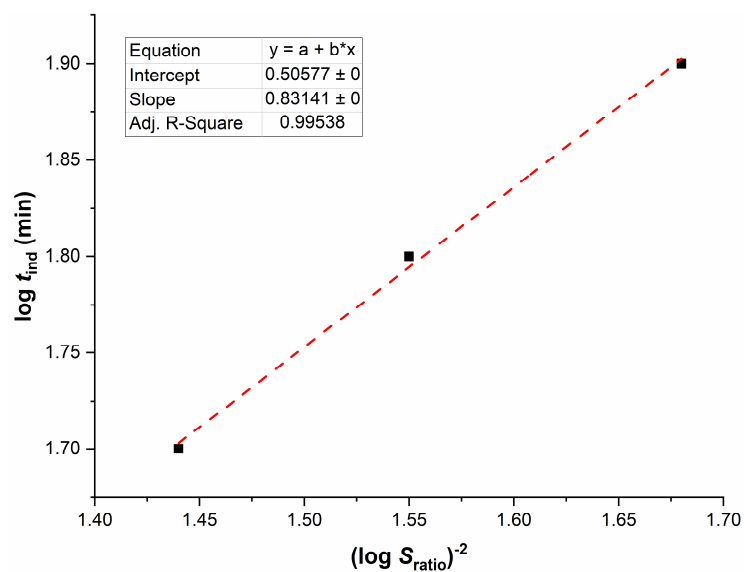

**Figure S5.** Correlation between the induction time ( $t_{ind}$ ) and the level of CTD supersaturation ( $S_{ratio}$ ).

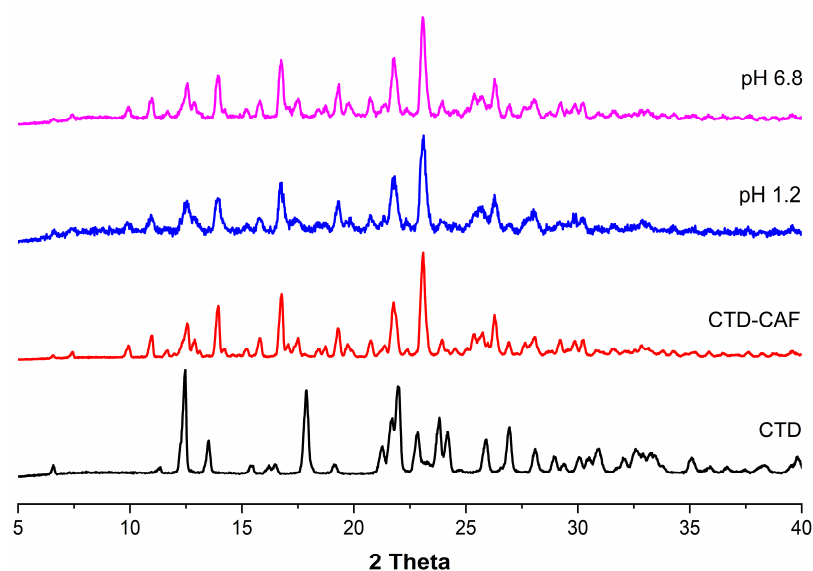

**Figure S6.** PXRD patterns of residual solids from the dissolution experiments of formulations containing CTD-CAF and HPMC 80-120 cPs. For comparison, PXRD patterns of CTD and CTD-CAF cocrystal before the experiments are also included.

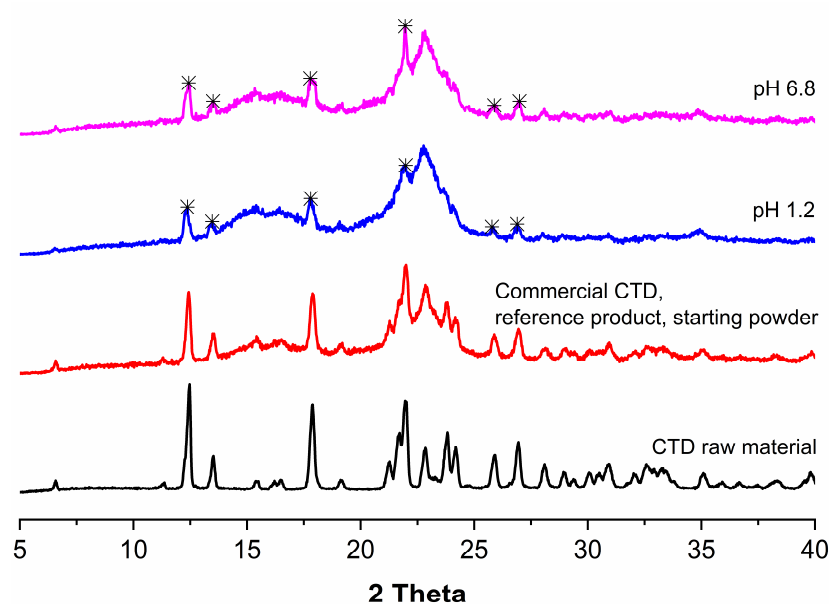

**Figure S7.** PXRD patterns of residual solids from dissolution experiments of commercial CTD reference product powder in capsules in HCl pH 1.2 and PBS pH 6.8. For comparison, PXRD patterns of CTD and commercial CTD product powder before the experiments also are shown. Note: asterisks indicate representative signals for CTD.

**Table S4.** Relevant results of the Two-Way ANOVA and Tukey Tests, at 0.05 significance.

| A          | B            | A       | B            | Means Difference | Probability          | Sig* |
|------------|--------------|---------|--------------|------------------|----------------------|------|
| CTD        | pH 6.8       | CTD     | pH 1.2       | -2.23667         | 1                    | 0    |
| CTD        | pH 1.2, HPMC | CTD     | pH 1.2       | 1.88333          | 1                    | 0    |
| CTD        | pH 6.8, HPMC | CTD     | pH 6.8       | 8.49333          | 0.98556              | 0    |
| CTD        | pH 6.8, HPMC | CTD     | pH 1.2, HPMC | 4.37333          | 0.99996              | 0    |
| MF CTD-CAF | pH 1.2       | CTD     | pH 1.2       | 15.10667         | 0.62587              | 0    |
| MF CTD-CAF | pH 6.8       | CTD     | pH 6.8       | 17.15333         | 0.44939              | 0    |
| MF CTD-CAF | pH 1.2, HPMC | CTD     | pH 1.2       | 16.23333         | 0.52735              | 0    |
| MF CTD-CAF | pH 6.8, HPMC | CTD     | pH 6.8       | 25.69667         | 0.05325              | 0    |
| MF CTD-CAF | pH 1.2, HPMC | CTD     | pH 1.2, HPMC | 14.35            | 0.69106              | 0    |
| MF CTD-CAF | pH 6.8, HPMC | CTD     | pH 6.8, HPMC | 17.20333         | 0.44528              | 0    |
| CTD-CAF    | pH 1.2       | CTD     | pH 1.2       | 53.14667         | $6 \times 10^{-6}$   | 1    |
| CTD-CAF    | pH 6.8       | CTD     | pH 6.8       | 93.81            | $2 \times 10^{-7}$   | 1    |
| CTD-CAF    | pH 1.2, HPMC | CTD     | pH 1.2       | 128.68667        | $6 \times 10^{-8}$   | 1    |
| CTD-CAF    | pH 6.8, HPMC | CTD     | pH 6.8       | 139.05667        | $6 \times 10^{-8}$   | 1    |
| CTD-CAF    | pH 6.8       | CTD-CAF | pH 1.2       | 38.42667         | $8.5 \times 10^{-4}$ | 1    |
| CTD-CAF    | pH 1.2, HPMC | CTD-CAF | pH 1.2       | 75.54            | $3 \times 10^{-8}$   | 1    |
| CTD-CAF    | pH 6.8, HPMC | CTD-CAF | pH 6.8       | 45.24667         | $8 \times 10^{-5}$   | 1    |
| CTD-CAF    | pH 6.8, HPMC | CTD-CAF | pH 1.2, HPMC | 8.13333          | 0.98964              | 0    |

\*Sig equal 1 indicates that the difference of the means is significant at the 0.05 level.

\*Sig equal 0 indicates that the difference of the means is not significant at the 0.05 level.
